# Supplementary material for: Ultrahigh-Pressure Preparation and Catalytic Activity of MOF-Derived Cu Nanoparticles
Source: MDPI journal article supplement (doi:10.3390/nano11041040), 2021-04-19
Supplement: s1 [file s1]

## Supporting Information

### Ultrahigh pressure preparation and catalytic activity of MOF-derived Cu nanoparticles

Ichiro Yamane<sup>1</sup>, Kota Stato<sup>1</sup>, Ryoichi Otomo<sup>2</sup>, Takashi Yanase<sup>3</sup>, Akira Miura<sup>3</sup>, Taro Nagahama<sup>3</sup>, Yuichi Kamiya<sup>2</sup>, Toshihiro Shimada<sup>3</sup>

1 Graduate School of Chemical Science and Engineering, Hokkaido University, Kita 13 Nishi 8, Kita-ku, Sapporo, 060-8628 Japan

2 Division of Environmental Materials Science, Graduate School of Environmental Science, Hokkaido University, Kita 10, Nishi 5, Kita-ku, Sapporo, 060-0810 Japan

3 Division of Applied Chemistry, Faculty of Engineering, Hokkaido University, Kita 13 Nishi 8, Kita-ku, Sapporo, 060-8628 Japan

#### 1. Preparation of ICP-OES Samples

Cu standard solution (Cu 1000 ppm, solvent 0.1 mol/L HNO<sub>3</sub>) was diluted with 1.3 mol/L HNO<sub>3</sub> to prepare Cu standard samples for making calibration curve at concentrations of 10 ppm, 5 ppm, 2.5 ppm, 1.25 ppm, and 500 ppb. Sample solutions to measure Cu content were prepared as follows: the sample powder was added to a flask with 13 mol/L (60 wt%) HNO<sub>3</sub> 10 mL, then the dispersion was heated until all of the powder was dissolved with refluxing. The obtained solutions were diluted with distilled water to make the HNO<sub>3</sub> concentration of 1.3 mol/L. These original solutions were further diluted with 1.3 mol/L HNO<sub>3</sub> to prepare two sample solutions with different concentrations for one sample.

## 2. Curve Fitting of XANES spectra

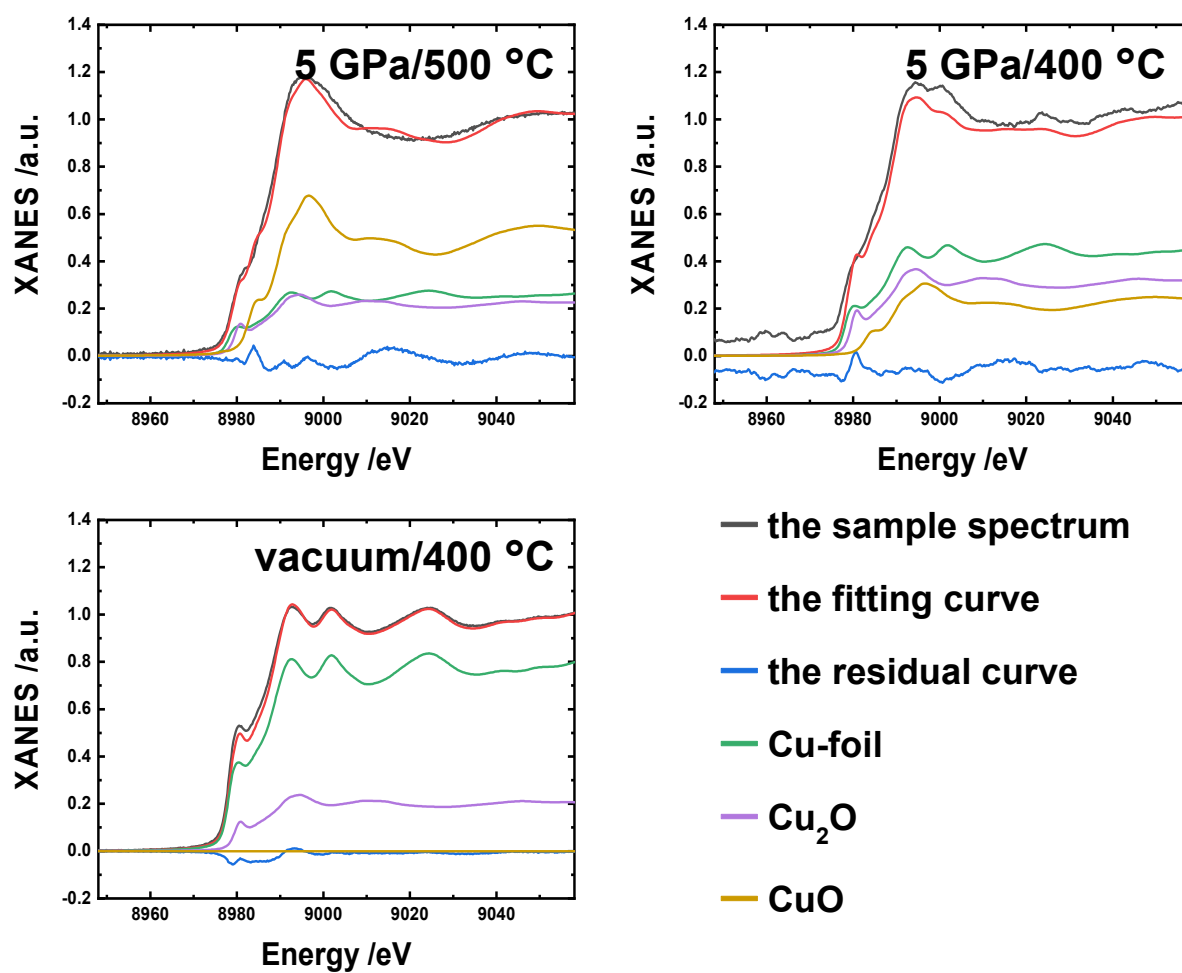

Figure S1: Curve fitting of the XANES spectra was least square of the residuals using spectra of Cu foil, Cu<sub>2</sub>O and CuO.
